# Supplementary material for: Ultra-Sensitive and Semi-Quantitative Vertical Flow Assay for the Rapid Detection of Interleukin-6 in Inflammatory Diseases
Source: MDPI journal article supplement (doi:10.3390/bios12090756), 2022-09-14
Supplement: s1 [file s1]

## Supporting Information

# Ultra-Sensitive and Semi-Quantitative Vertical Flow Assay for the Rapid Detection of Interleukin-6 in Inflammatory Diseases

Rongwei Lei, Hufsa Arain, Maryam Obaid, Nivriti Sabhnani, Chandra Mohan \*

Department of Biomedical Engineering, University of Houston, Houston, TX 77004, USA

\* Correspondence: cmohan@central.uh.edu; Tel.: +1-713-743-3709

### Supplementary Methods:

Assay protocol-1. In total, 80  $\mu$ L of buffer-1 (20 mM Tris, 150 mM NaCl, 1% BSA, 0.18% Tween-20, 0.5% PEG, pH 8, filtered) was applied to the nitrocellulose membrane (NCM), then 80  $\mu$ L of blocking buffer (3mM EDTA, 3% BSA, 0.1% gelatin, filtered) was added to NCM for 5 min. Following an additional 80  $\mu$ L wash with buffer-1, 100  $\mu$ L of buffer-1 spiked with the analyte or non-spiked (0 ng/mL) was loaded onto two spotted quadrants, respectively. Following an 80  $\mu$ L wash with buffer-1, 20  $\mu$ L of 10  $\mu$ g/mL biotinylated anti-IL-6 in buffer-1 was individually loaded to the two quadrants in NCM. Following an additional 80  $\mu$ L wash with buffer-1, 5  $\mu$ L OD = 2 150-SA-GNP in buffer-1 was loaded to the two quadrants, respectively. After 30 s, 800  $\mu$ L of buffer-1 was loaded to wash off any background.

Assay protocol-2. Buffer-2 (20 mM Tris, 150 mM NaCl, 1% BSA, 0.18% tween 20, 0.5% PVP40, pH 8, filtered) was substituted for buffer-1 in Assay protocol-1 and the following steps remained constant.

**Table S1.** The mean levels of IL-6 reported in blood, serum, or plasma of healthy controls and various inflammatory diseases.

| Condition                | Mean IL-6 levels (range) | References |
|--------------------------|--------------------------|------------|
| Healthy control          | 5.2 pg/mL (0-7)          | [13]       |
| COVID-19 induced CRS†    | 40 pg/mL (34.5-214.5)    | [14]       |
| Irritable bowel syndrome | 1.1 pg/mL (0.5-1.6)      | [15]       |
| Obstructive Sleep Apnea  | 1.2 pg/mL (1.1-1.4)      | [16]       |
| Fibromyalgia Syndrome    | 134.9 pg/mL (67.6-202.2) | [17]       |
| Rheumatoid Arthritis     | 35.1 pg/mL (13.8-56.4)   | [18]       |
| Atrial Fibrillation      | 14 pg/mL (0.2-156.5)     | [19]       |
| Atypical Depression      | 2.5 pg/mL (1.2-3.8)      | [20]       |
| Breast Cancer            | 111.4 pg/mL              | [21]       |
| Sepsis                   | 3.5 ng/mL (<0.1-305)     | [22]       |
| COVID-19 Pneumonia       | 1000 pg/mL (20-10,000)   | [23]       |

|                                 |                     |      |
|---------------------------------|---------------------|------|
| CAR-T cell therapy induced CRS† | 3000 pg/mL          | [24] |
| Lung cancer (Stage 4)           | 36.5 pg/mL (20-400) | [25] |
| Pneumonia                       | 2852 pg/mL          | [26] |
| Polycystic ovary syndrome       | 4.8 pg/mL (0-1000)  | [27] |
| Ovarian cancer                  | 55.6 pg/mL (0-2869) | [28] |
| Renal cell carcinoma            | 224 pg/mL (62-707)  | [29] |
| Pancreatic cancer               | 3-156 pg/mL         | [5]  |

CRS: Cytokine release syndrome

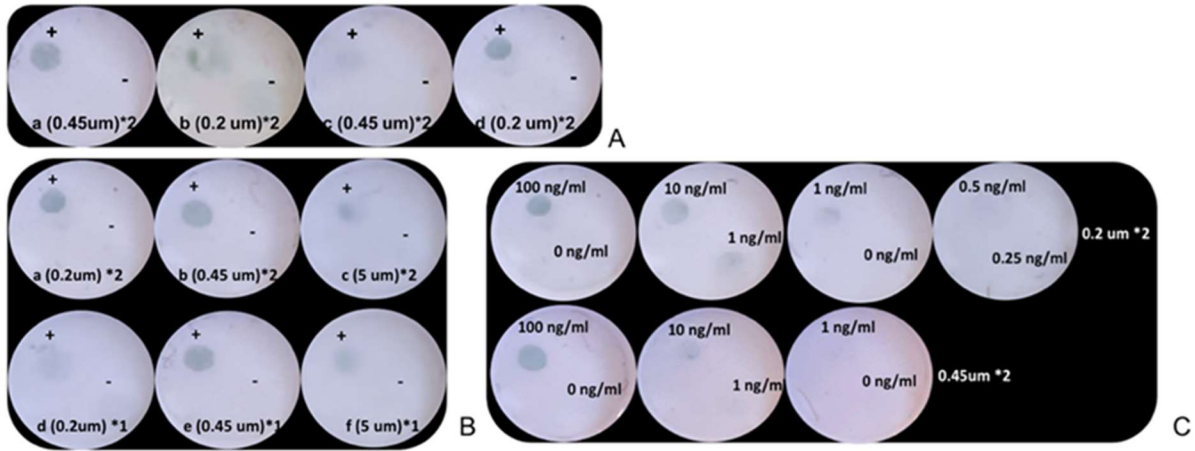

**Figure S1.** The evaluation of buffer, membrane type, and membrane layer numbers on the performance of 150 nm streptavidin GNP-based (150-SA-GNP) IL-6 VFA. (A) Two layers of Cytiva NCM 0.2  $\mu\text{m}$  or 0.45  $\mu\text{m}$  were assembled into the VFA. Each label within the figure displays the pore size and the number of layers of membrane tested. The top left quadrant is marked as + (spiked with 100 ng/mL rIL-6) and the bottom right quadrant is marked as – (non-spiked sample). The + (100 ng/mL) zone should appear as a homogenous, uniform green spot with maximum intensity, while the – (0 pg/mL) test zone should show no signal. The 0.45  $\mu\text{m}$  pore size NCM outperformed 0.2  $\mu\text{m}$  NCM using supplementary methods Assay protocol-1 (a,b) and 0.2  $\mu\text{m}$  pore size NCM outperformed 0.45  $\mu\text{m}$  NCM using supplementary methods Assay protocol-2 (c,d). (B) The first row depicts three types of porous membranes (0.2  $\mu\text{m}$ , 0.45  $\mu\text{m}$ , and 5  $\mu\text{m}$ ) that were evaluated to detect 100 ng/mL rIL-6 (+) and non-spiked sample (–) using double-stacked layers of membrane (a–c). The second row depicts the same three types of porous membranes that were evaluated to detect 100 ng/mL rIL-6 (+) and non-spiked sample (–) using single-stacked layers of membrane (d–f). The 0.2  $\mu\text{m}$  NCM showed stronger positive signal when using two layers of NCM, while 0.45  $\mu\text{m}$  and 5  $\mu\text{m}$  NCM showed a comparable positive signal with either one or two layers of NCM. (C) The first row depicts images corresponding to IL-6 serial dilution, assayed using 0.2  $\mu\text{m}$  NCM, following assay protocol-2. The second row depicts images corresponding to IL-6 serial dilution, assayed using on 0.45  $\mu\text{m}$  NCM using assay protocol-1. Amersham 0.2  $\mu\text{m}$  membrane showed higher sensitivity than Amersham 0.45  $\mu\text{m}$ .

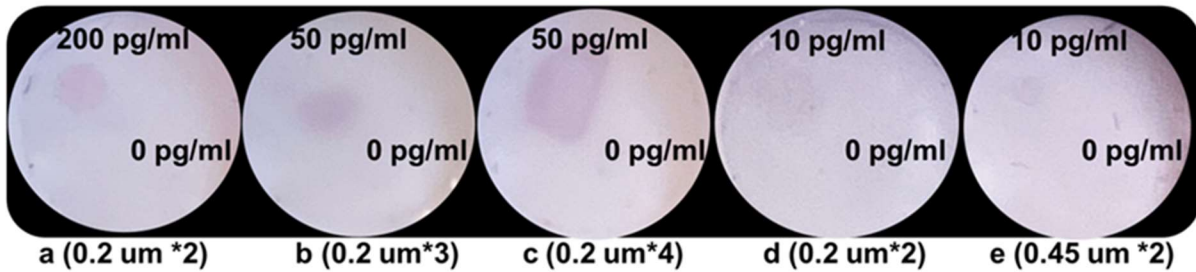

**Figure S2.** Characteristics of 40 nm streptavidin GNP-based (40-SA-GNP) VFA. Given the limited sensitivity of 150-SA-GNP, 40-SA-GNP was next evaluated. In total, 1  $\mu$ L of 1 mg/mL anti-IL-6 was spotted on top left quadrant (+pg/mL of rIL-6) and lower right quadrant (0 pg/mL) on 0.2  $\mu$ m NCM (Cytiva). Two (a), three (b), and four (c) layers of 0.2  $\mu$ m NCM (Cytiva) were assembled with two layers of CF5 and one layer of CF7 absorbent pad. Following supplementary methods assay protocol-2, rIL-6-spiked buffer-2 (200 pg/mL or 50 pg/mL) and non-spiked (0 ng/mL) were loaded to the top left quadrant and lower right quadrant, respectively. It is found that the position of test zone shifted dramatically when using three NCM layers, while a wide area of positive signal appeared when using four NCM layers, thus rendering two NCM layers a more optimal choice. Following supplementary methods assay protocol-2, two layers of 0.2  $\mu$ m NCM (d), and two layers of 0.45  $\mu$ m NCM (e) were assembled, and both showed a dim signal at the top left quadrant of NCM for detecting 10 pg/mL of rIL-6 and no background at the lower right quadrant of NCM for detecting non-spiked buffer-2 (0 pg/mL).
